# Supplementary material for: Frequency of the Main Human Leukocyte Antigen A, B, DR, and DQ Loci Known to Be Associated with the Clearance or Persistence of Hepatitis C Virus Infection in a Healthy Population from the Southern Region of Morocco: A Preliminary Study
Source: MDPI journal article supplement (doi:10.3390/diseases12050106), 2024-05-16
Supplement: s1 [file s1]

## Supplementary Materials

**Table S1.** Frequency of HLA-A loci by gender.

| HLA-A Locus | Female (n=329, 658 allele) |                      | Male (n=355, 710 allele) |                      |
|-------------|----------------------------|----------------------|--------------------------|----------------------|
|             | Allele group N             | Allele Frequency (%) | Allele group N           | Allele Frequency (%) |
| <b>A1</b>   | 81                         | <b>12.31</b>         | 78                       | <b>11</b>            |
| <b>A2</b>   | 155                        | <b>23.6</b>          | 164                      | <b>23.1</b>          |
| <b>A3</b>   | 62                         | <b>9.42</b>          | 60                       | <b>8.45</b>          |
| <b>A9</b>   | 0                          | -                    | 3                        | 0.42                 |
| <b>A10</b>  | 4                          | 0.61                 | 1                        | 0.14                 |
| <b>A11</b>  | 24                         | 3.65                 | 26                       | 3.66                 |
| <b>A19</b>  | 0                          | -                    | 1                        | 0.14                 |
| <b>A23</b>  | 46                         | 7                    | 63                       | 8.87                 |
| <b>A24</b>  | 50                         | 7.6                  | 59                       | 8.31                 |
| <b>A25</b>  | 1                          | 0.15                 | 1                        | 0.14                 |
| <b>A26</b>  | 16                         | 2.43                 | 20                       | 2.82                 |
| <b>A28</b>  | 7                          | 1.06                 | 4                        | 0.56                 |
| <b>A29</b>  | 17                         | 2.58                 | 26                       | 3.66                 |
| <b>A30</b>  | 35                         | 5.32                 | 54                       | 7.61                 |
| <b>A31</b>  | 6                          | 0.91                 | 11                       | 1.55                 |
| <b>A32</b>  | 28                         | 4.26                 | 22                       | 3.1                  |
| <b>A33</b>  | 27                         | 4.1                  | 28                       | 3.94                 |
| <b>A34</b>  | 15                         | 2.28                 | 16                       | 2,25                 |
| <b>A36</b>  | 3                          | 0.46                 | 0                        | -                    |
| <b>A66</b>  | 7                          | 1.06                 | 6                        | 0.85                 |
| <b>A68</b>  | 53                         | 8.05                 | 54                       | 7.61                 |
| <b>A69</b>  | 3                          | 0.46                 | 0                        | -                    |
| <b>A74</b>  | 5                          | 0.76                 | 6                        | 0.85                 |
| <b>A80</b>  | 13                         | 1.98                 | 7                        | 1                    |

**Table S2.** Frequency of HLA-B locus allele groups by gender.

| HLA-B Locus | Female (n=329, 658 allele) |                      | Male (n=355, 710allele) |                      |
|-------------|----------------------------|----------------------|-------------------------|----------------------|
|             | Allele group N             | Allele Frequency (%) | Allele group N          | Allele Frequency (%) |
| <b>B2</b>   | 0                          | -                    | 1                       | 0.14                 |
| <b>B7</b>   | 30                         | 4.56                 | <b>48</b>               | <b>6.76</b>          |
| <b>B8</b>   | <b>48</b>                  | <b>7.29</b>          | 42                      | 5.92                 |
| <b>B12</b>  | 1                          | 0.15                 | 0                       | -                    |
| <b>B13</b>  | 8                          | 1.22                 | 6                       | 0.85                 |
| <b>B14</b>  | 30                         | 4.56                 | 29                      | 4.08                 |
| <b>B15</b>  | 9                          | 1.37                 | 14                      | 1.97                 |
| <b>B17</b>  | 4                          | 0.61                 | 7                       | 1                    |
| <b>B18</b>  | 28                         | 4.26                 | 30                      | 4.23                 |
| <b>B21</b>  | 2                          | 0.3                  | 2                       | 0.28                 |
| <b>B27</b>  | 18                         | 2.74                 | 32                      | 4.51                 |
| <b>B35</b>  | 42                         | 6.38                 | 36                      | 5.07                 |

|     |    |       |    |       |
|-----|----|-------|----|-------|
| B37 | 5  | 0.76  | 4  | 0.56  |
| B38 | 15 | 2.28  | 28 | 3.94  |
| B39 | 12 | 1.82  | 15 | 2.11  |
| B40 | 20 | 3.04  | 14 | 1.97  |
| B41 | 14 | 2.13  | 19 | 2.68  |
| B42 | 12 | 1.82  | 17 | 2.39  |
| B44 | 53 | 8.05  | 73 | 10.28 |
| B45 | 38 | 5.78  | 44 | 6.2   |
| B47 | 1  | 0.15  | 5  | 0.7   |
| B49 | 54 | 8.21  | 34 | 4.79  |
| B50 | 38 | 5.78  | 33 | 4.65  |
| B51 | 72 | 10.94 | 64 | 9.01  |
| B52 | 5  | 0.76  | 12 | 1.69  |
| B53 | 17 | 2.58  | 19 | 2.68  |
| B55 | 2  | 0.3   | 1  | 0.14  |
| B56 | 1  | 0.15  | 2  | 0.28  |
| B57 | 22 | 3.34  | 9  | 1.27  |
| B58 | 21 | 3.19  | 36 | 5.07  |
| B62 | 1  | 0.15  | 2  | 0.28  |
| B63 | 18 | 2.74  | 11 | 1.55  |
| B64 | 2  | 0.3   | 0  | -     |
| B65 | 0  | -     | 1  | 0.14  |
| B70 | 1  | 0.15  | 0  | -     |
| B71 | 0  | -     | 1  | 0.14  |
| B72 | 10 | 1.52  | 13 | 1.83  |
| B73 | 1  | 0.15  | 0  | -     |
| B78 | 3  | 0.46  | 6  | 0.85  |

Table S3. Frequency of HLA-DRB1 allele groups by gender.

| HLA-DRB1<br>Locus | Female (n=166, 332allele) |                  | Male (n=157, 314allele) |                  |
|-------------------|---------------------------|------------------|-------------------------|------------------|
|                   | Allele group              | Allele Frequency | Allele group            | Allele Frequency |
|                   | N                         | (%)              | N                       | (%)              |
| DRB1*01           | 28                        | 8.43             | 20                      | 6.37             |
| DRB1*03           | 67                        | 20.18            | 57                      | 18.15            |
| DRB1*04           | 41                        | 12.35            | 41                      | 13.06            |
| DRB1*07           | 56                        | 16.87            | 40                      | 12.74            |
| DRB1*08           | 7                         | 2.11             | 9                       | 2.87             |
| DRB1*09           | 4                         | 1.2              | 6                       | 1.91             |
| DRB1*10           | 3                         | 0.9              | 3                       | 0.96             |
| DRB1*11           | 36                        | 10.84            | 29                      | 9.24             |
| DRB1*12           | 0                         | -                | 4                       | 1.27             |
| DRB1*13           | 52                        | 15.66            | 50                      | 15.92            |
| DRB1*14           | 2                         | 0.6              | 4                       | 1.27             |
| DRB1*15           | 36                        | 10.84            | 50                      | 15.92            |
| DRB1*16           | 0                         | -                | 1                       | 0.32             |

**Table S4.** Frequency of HLA-DQB1 allele groups by gender.

| HLA-DQB1<br>Locus | Female (n=166, 332 alleles) |                         | Male (n=157, 314 alleles) |                         |
|-------------------|-----------------------------|-------------------------|---------------------------|-------------------------|
|                   | Allele<br>group N           | Allele Frequency<br>(%) | Allele group<br>N         | Allele Frequency<br>(%) |
| DQB1*02           | 120                         | <b>36.14</b>            | 94                        | <b>29.94</b>            |
| DQB1*03           | 80                          | <b>24.1</b>             | 75                        | <b>23.89</b>            |
| DQB1*04           | 19                          | 5.72                    | 16                        | 5.1                     |
| DQB1*05           | 44                          | 13.25                   | 40                        | 12.74                   |
| DQB1*06           | 69                          | <b>20.78</b>            | 88                        | <b>28.03</b>            |
| DQB1*07           | 0                           | -                       | 1                         | 0.32                    |
